# Supplementary material for: A possible channel effect of the organics adsorbed to the electrode surface on interfacial electron transfer in the alkaline Pb electrodeposition process
Source: Royal Society of Chemistry journal article supplement (doi:10.1039/d1nj01124c), 2021-01-01
Supplement: d1nj01124c1.pdf [file d1nj01124c1.pdf]

# New Journal of Chemistry

## Supplementary Information

### **A possible channel effect of the organics adsorbed to the electrode surface on interfacial electron transfer in alkaline Pb electrodeposition process**

Xin-Jie Liu<sup>1,2</sup>, Guang-Shi Tang<sup>1,\*</sup>, Jun-Qing Pan<sup>1,\*</sup>, Chun-Ze Ma<sup>1</sup>, Kang-Ni Wan<sup>1</sup>

1 State Key Laboratory of Chemical Resource Engineering, Beijing University of Chemical Technology, Beijing 100029, China.

2 Guangxi University of Science and Technology, Liuzhou, 545006, China.

\*Corresponding author E-mail address: [tgs1803@163.com](mailto:tgs1803@163.com) (G.-S. Tang),  
[jqpan@mail.buct.edu.cn](mailto:jqpan@mail.buct.edu.cn) (J. Pan).

**Key words:** electron transfer; channel; molecular-bridge;  $\pi$ -bond system; electrodeposition; additive

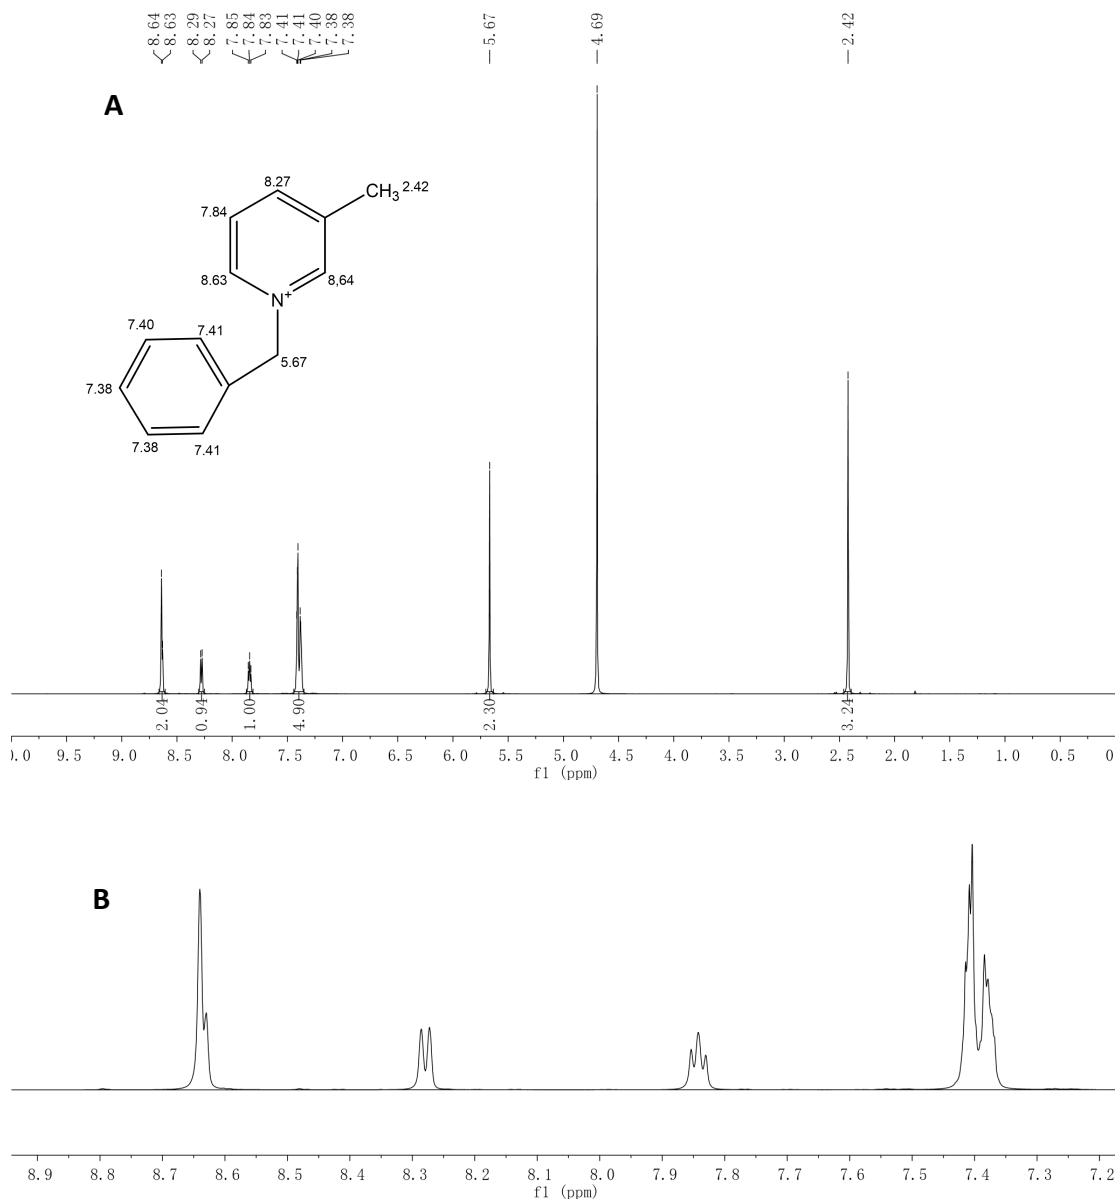

Figure S1. (A)  $^1\text{H-NMR}$  of BMP and (B) the amplification of coupling peaks moiety in  $^1\text{H-NMR}$  of BMP

600 MHz  $^1\text{H-NMR}$  ( $\text{D}_2\text{O}$ )  $\delta=8.64$  (s, 1H, between  $-\text{CH}_3$  and  $\text{N}^+$ ), 8.642-8.63 (d,  $J = 7.8$  Hz, 1H), 8.286-8.273 (d,  $J = 7.8$  Hz, 1H), 7.854-7.830 (t,  $J = 7.8$  Hz, 1H), 7.41 – 7.38 (m, 5H), 5.67 (s,  $-\text{CH}_2$ , 2H), 2.42 (s,  $-\text{CH}_3$ , 3H). It is worth to be noted that signals of two H atoms beside N atom have been overlapped.

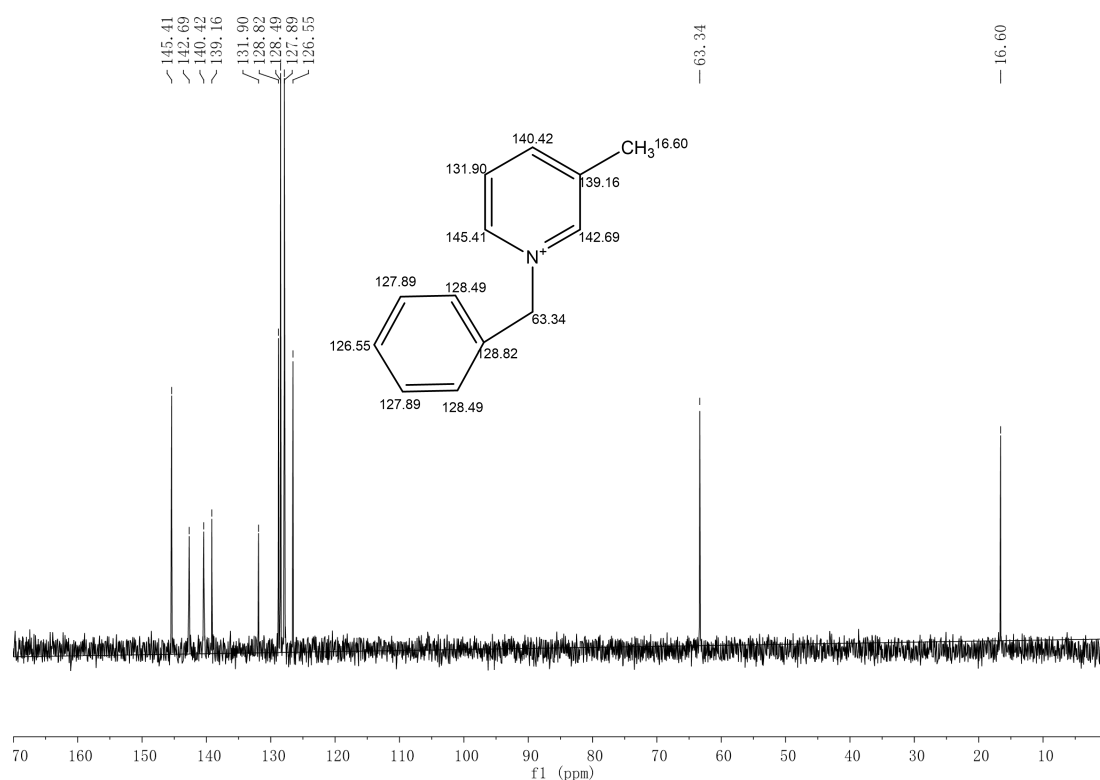

Figure S2.  $^{13}\text{C}$ -NMR of BMP

600 MHz  $^{13}\text{C}$ -NMR ( $\text{D}_2\text{O}$ )  $\delta$ =145.41 (s), 142.69 (s), 140.42 (s), 139.16 (s), 131.90 (s);  
 128.82, 128.49, 127.89, 126.55(s) in benzyl group; 63.34 ( $\text{N-CH}_2$ ), 16.60( $\text{-CH}_3$ )

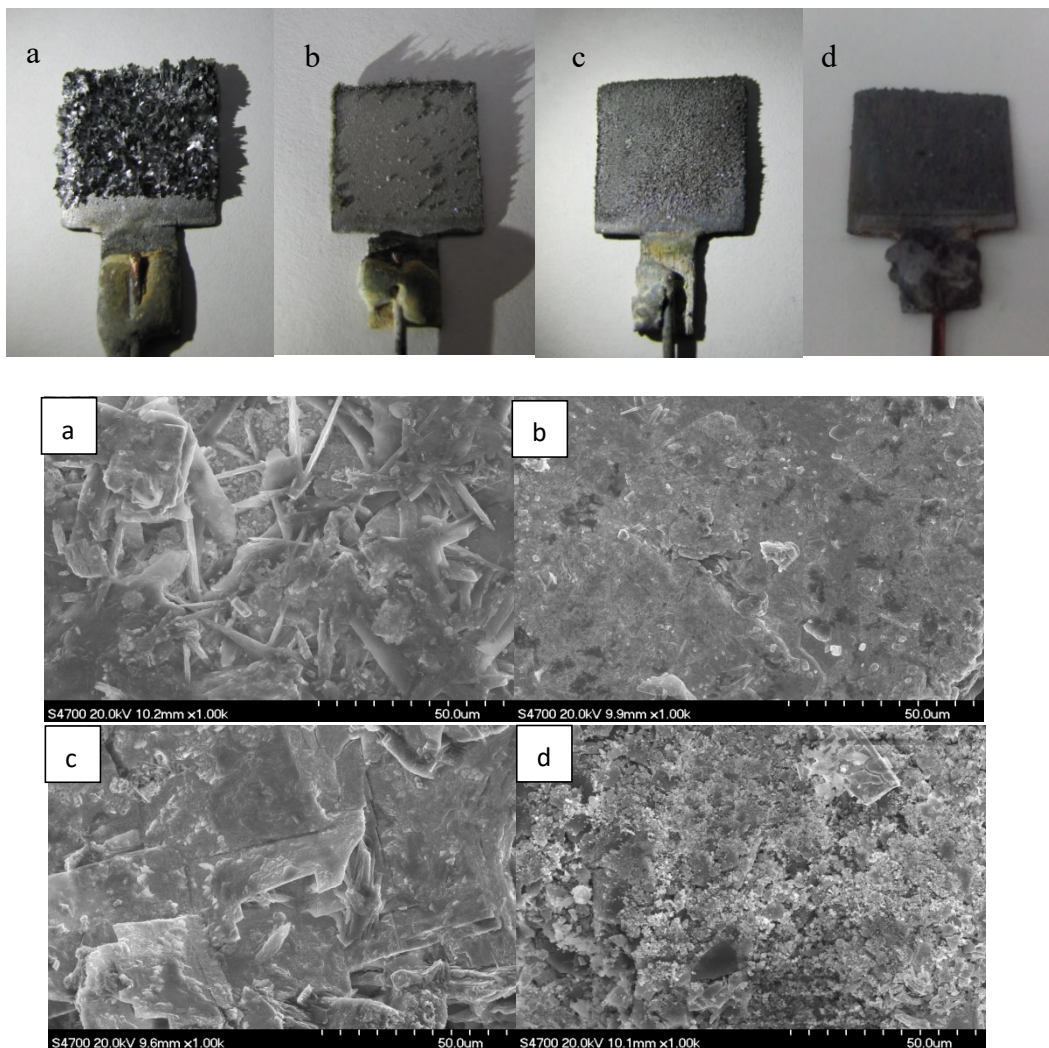

*Figure S3. Digital photograph and Scanning Electron Microscope (SEM) pictures of lead deposit obtained from electrolyte without additive (a) and with 0.003 M BCP (b), 0.003 M BMP (c) and 1.5 g/L gelatin (d) at 10 mA/cm<sup>2</sup> in 300 s.*

*Scheme S1: Equivalent circuit used to model impedance data*

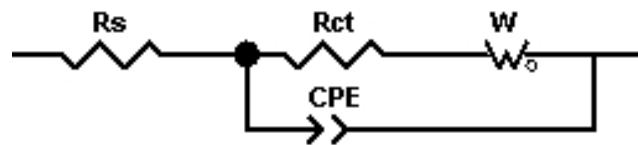

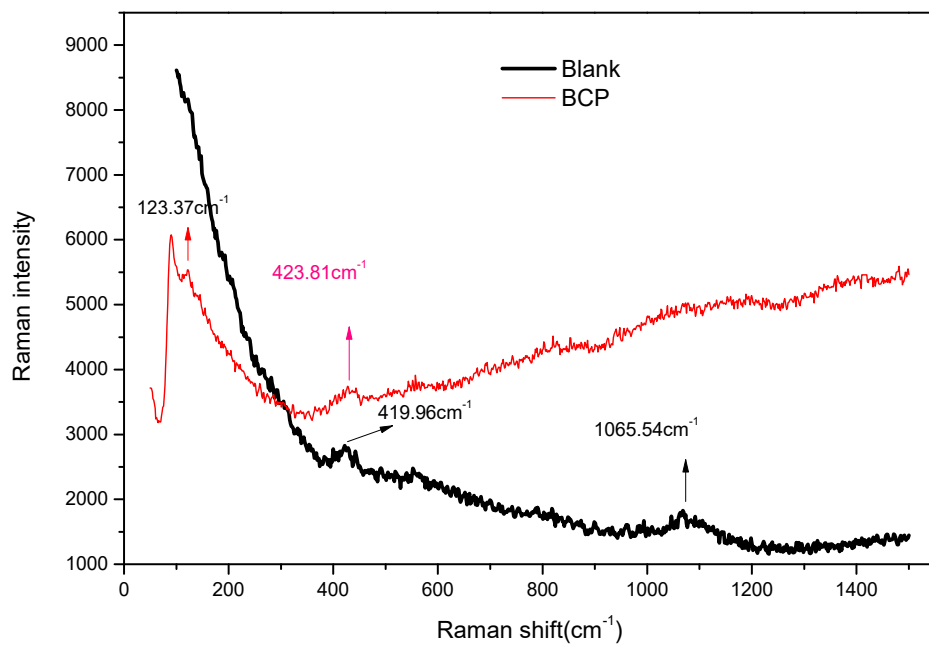

Figure S4. Raman spectroscopy of electrolyte with and without 0.003 M BCP

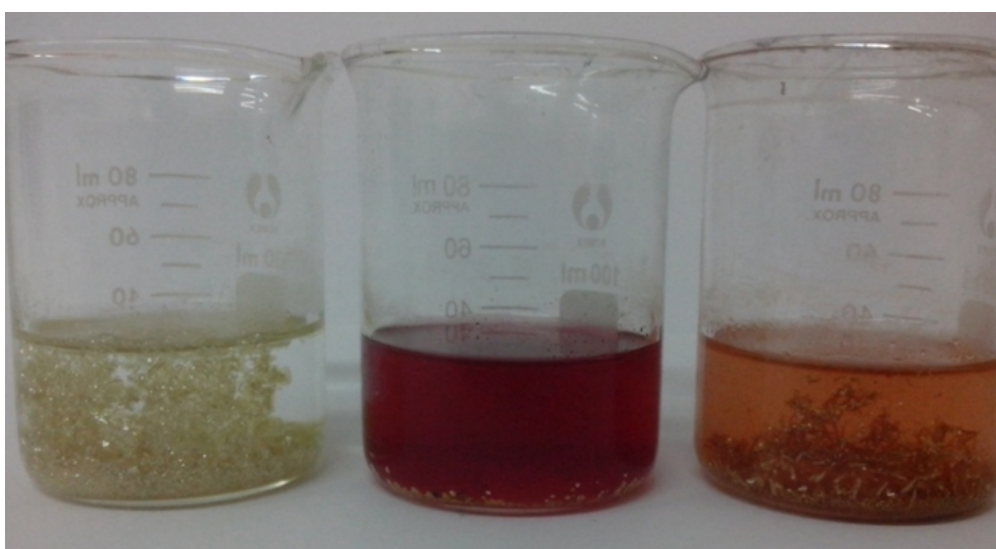

*Figure S5. Photos of electrolyte without additive (left), with 0.003 M BCP (middle) and with 0.003 M BMP(right) at 288 K cooling from 353 K*

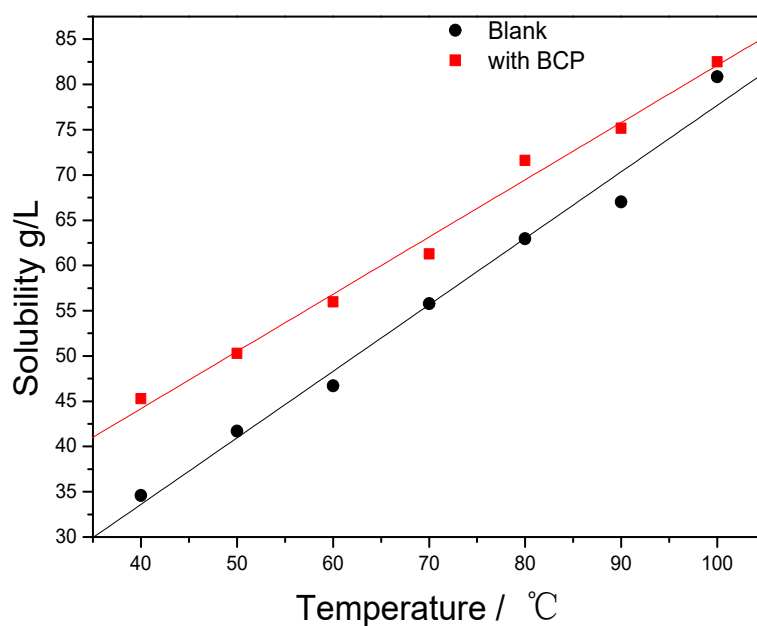

Figure S6. The solubility curve of PbO in the 6.25 M NaOH 0.1L solution without (Blank) and with 0.003 M BCP. The temperature was raised from 298 K to 373 K, then PbO was stepwisely added per gram into 0.1 L solution until PbO could not be dissolved, and the accumulated mass of PbO added was recorded.



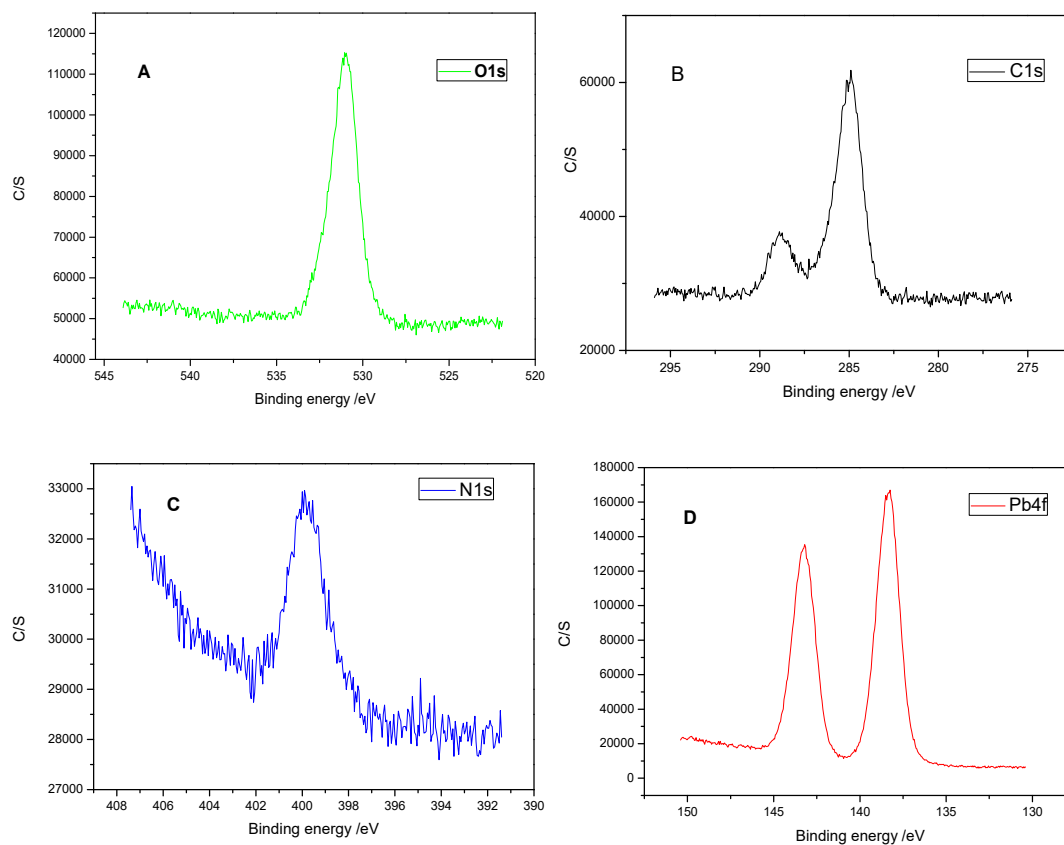

Figure S7. The XPS spectrum of O1s (A), C1s (B), N1s (C), Pb4f (D)
